# Supplementary material
Source: PubMed Central journal article supplement (PMC8791309)
Supplement: KID.0006992020SupplementaryData.pdf [file KID.0006992020SupplementaryData.pdf]

## Supplemental Material Table of Contents

- **Supplementary Table 1:** Criteria for the scoring of kidney samples using light microscopy
- **Supplementary Table 2.** Clinical and biological characteristics of the SARS-CoV-2-infected patients by type of hospitalization wards
- **Supplementary Table 3.** Clinical and biological characteristics of the control group (SARS-CoV-2 non-infected patients)
- **Supplementary Table 4.** Summary of the case series using kidney biopsies of SARS-CoV-2 infected patients
- **Supplementary Figure 1.** Non-thrombotic congestion in glomerular and peritubular capillaries of kidney samples from patients with COVID-19
- **Supplementary Figure 2.** Representative immunostaining for angiotensin-converting enzyme 2 (ACE2) in *post-mortem* paraffin-embedded kidney tissue from a patient with COVID-19 (patient #11)
- **Supplementary Figure 3.** Representative immunostaining for SARS-CoV-2 nucleocapsid protein at low magnification in *post-mortem* paraffin-embedded kidney tissue from patients with COVID-19 (patients #1 & #3)
- **Supplementary Figure 4.** Immunostaining for (A) nucleocapsid N protein of the SARS-CoV-2 (NP) and (B) Sodium-Chloride cotransporter (NCC) on serial paraffin-embedded sections (patient #6)
- **Supplementary Figure 5.** Detection and spatial distribution of viral RNA using fluorescence *in situ* hybridization.
- **Supplementary Figure 6.** Experimental controls of the fluorescent *in situ* hybridization experiment
- **Supplementary Figure 7.** Experimental controls of the immunostaining experiment

**Supplementary Table 1: Criteria for the scoring of kidney samples using light microscopy**

| <b>Glomerular compartment</b>                                                                                                | <b>Tubular compartment</b>                                                               | <b>Interstitial compartment</b>        | <b>Vascular compartment</b>                                                                    |
|------------------------------------------------------------------------------------------------------------------------------|------------------------------------------------------------------------------------------|----------------------------------------|------------------------------------------------------------------------------------------------|
| Glomerulosclerosis (n)                                                                                                       | Cytoplasmic vacuolization*                                                               | Interstitial edema                     | <b>Artery</b><br>Arteritis <sup>§</sup><br>Endothelial cell swelling<br>Thrombi                |
| Ischemic glomeruli                                                                                                           | Tubular dilatation                                                                       | Interstitial inflammation <sup>§</sup> |                                                                                                |
| <b>Proliferative lesions</b><br>- Endocapillary proliferation<br>- Mesangial proliferation<br>- Extracapillary proliferation | Apical blebbing                                                                          | Interstitial hemorrhage                | Vascular wall thickening                                                                       |
|                                                                                                                              | Loss of brush border                                                                     | Calcifications                         |                                                                                                |
|                                                                                                                              | Tubular epithelium thinned                                                               | Interstitial fibrosis <sup>§</sup>     | <b>Arteriole</b><br>Endothelial cell swelling<br>Thrombi<br>Arteriolar hyalinosis <sup>§</sup> |
| Mesangial matrix expansion                                                                                                   | Necrosis                                                                                 |                                        |                                                                                                |
| <b>FSGS lesions</b><br>- Flocculo-capsular synechiae<br>- Podocyte hypertrophy<br>- FSGS                                     | Apoptosis                                                                                |                                        | <b>Peritubular capillary</b><br>Capillary congestion<br>Capillaritis <sup>§</sup>              |
|                                                                                                                              | <b>Glomerular basement membrane</b><br>- Splitting of GBM<br>- Membranous glomerulopathy |                                        |                                                                                                |
| Mitosis                                                                                                                      |                                                                                          |                                        |                                                                                                |
| <b>Acute tubular necrosis</b><br>Predominant localization<br>Extent*<br>Severity                                             |                                                                                          |                                        |                                                                                                |
| <b>Glomerular capillary</b><br>- Congestion<br>- Endothelial cell swelling<br>- Thrombi                                      | Intratubular pigment                                                                     |                                        |                                                                                                |
|                                                                                                                              | Nuclear dystrophy                                                                        |                                        |                                                                                                |
|                                                                                                                              | Viral inclusions                                                                         |                                        |                                                                                                |
|                                                                                                                              | Tubular atrophy <sup>§</sup>                                                             |                                        |                                                                                                |
|                                                                                                                              | Tubulitis <sup>§</sup>                                                                   |                                        |                                                                                                |
|                                                                                                                              | Renal tubular epithelial casts<br>- Hyaline<br>- Red blood cells<br>- Leukocyte          |                                        |                                                                                                |

The items are scored as present or absent, except \*, scored semi-quantitatively by approximate extent of tubule involvement as: none, >0-25%, 26-50% or >50% tubules with corresponding histological lesions and <sup>s</sup>, graded similarly to the Banff criteria<sup>57</sup>. FSGS: focal and segmental glomerulosclerosis; GBM: glomerular basement membrane; n: number.

**Supplementary Table 2: Clinical and biological characteristics of the SARS-CoV-2-infected patients by type of hospitalization wards**

|                                                        | <b>ICU wards</b>  | <b>Non-ICU wards</b> | <b>p</b>     |
|--------------------------------------------------------|-------------------|----------------------|--------------|
| Number of patients                                     | 10                | 6                    |              |
| Age (years) – mean [min; max]                          | 62 [49; 73]       | 78.6 [60; 95]        | <b>0.007</b> |
| Women – (%)                                            | 30                | 33                   | ns           |
| Body Mass index (kg/m <sup>2</sup> ) – mean [min; max] | 31.6 [20.7; 39.2] | 29.3 [23.7; 39.6]    | ns           |
| <b>History</b>                                         |                   |                      |              |
| Hypertension – %                                       | 60                | 66.7                 | ns           |
| Diabetes – %                                           | 40                | 83.3                 | ns           |
| Chronic kidney disease – %                             | 25                | 25                   | ns           |
| Cancer history – %                                     | 20                | 0                    | ns           |
| Cardiovascular disease – %                             | 50                | 33.3                 | ns           |
| Immunocompromise status – %                            | 30                | 16.7                 | ns           |
| Non-smoker – %                                         | 100               | 40                   | <b>0.03</b>  |
| RAAS inhibitors drugs – %                              | 60                | 33.3                 | ns           |
| Hydroxychloroquine used – %                            | 90                | 83.3                 | ns           |
| Contrast products injection – %                        | 20                | 16.7                 | ns           |
| Anti-platelets used priori hospitalization – %         | 50                | 33.3                 | ns           |
| Anticoagulation during hospitalization – %             | 100               | 33.3                 | <b>0.008</b> |
| Hospital stay length (days) – median [IQR]             | 22.5 [8; 45]      | 6 [3; 12]            | <b>0.02</b>  |
| <b>Severity</b>                                        |                   |                      |              |
| Thorax CT-Scanner staging                              |                   |                      | ns           |
| Minor (<10%)                                           | 10                | 33.3                 |              |
| Mild (10-50%)                                          | 30                | 50                   |              |
| Severe (>50%)                                          | 60                | 16.7                 |              |

|                                                                                                                |                    |                    |              |
|----------------------------------------------------------------------------------------------------------------|--------------------|--------------------|--------------|
| <b>Renal severity</b>                                                                                          |                    |                    |              |
| AKI – %                                                                                                        | 80                 | 33.3               | ns           |
| RRT initiation during hospitalization – %                                                                      | 30                 | 0                  | ns           |
| 30% decrease of eGFR during hospitalization – %                                                                | 80                 | 0                  | <b>0.007</b> |
| Proteinuria at D0 > 500 mg/g of urine creatinine – %                                                           | 50                 | 60                 | ns           |
| Hematuria at D0 – %                                                                                            | 62.5               | 40                 | ns           |
| <b>Laboratory results</b>                                                                                      |                    |                    |              |
| ABO group – (%)                                                                                                |                    |                    | ns           |
| A                                                                                                              | 55.6               | 80                 |              |
| B                                                                                                              | 11.1               | 20                 |              |
| AB                                                                                                             | 0                  | 0                  |              |
| O                                                                                                              | 33.3               | 0                  |              |
| Lymphocytes at D0 (/mm <sup>3</sup> ) – median [IQR] – (range 1100-3700/mm <sup>3</sup> )                      | 645 [410; 1410]    | 990 [540; 1460]    | ns           |
| Platelets at D0 (x1000/mm <sup>3</sup> ) – mean [min; max] – (range 150-353*10 <sup>3</sup> /mm <sup>3</sup> ) | 183 [155; 277]     | 199 [137;261]      | ns           |
| CRP at D0 (mg/L) – mean [min; max] – (range 0-5mg/L)                                                           | 178.6 [4.4; 382.4] | 146.3 [8.5; 272.2] | ns           |
| Fibrinogen (g/L) at D0 – median [IQR] – (range 1.79-3.86g/L)                                                   | 6.58 [3.7; 7.72]   | 7.26 [6.31; 7.72]  | ns           |
| Procalcitonin at D0 (µg/L) – median [IQR] – (range <0.05 µg/L)                                                 | 0.41 [0.14; 1.63]  | 0.22 [0.16; 0.53]  | ns           |
| D-Dimer at D0 (µg/L) – mean [min; max] – (range <500 µg/L)                                                     | 1448.8 [565; 2991] | 1142.4 [329; 2384] | ns           |
| LDH at D0 (U/L) – mean [min; max] – (range 125-220 U/L)                                                        | 618.5 [269; 881]   | 390 [195; 707]     | ns           |
| CPK at D0 (U/L) – median [IQR] – (range 29-168 U/L)                                                            | 381 [240; 592]     | 205.5 [34; 292]    | 0.05         |
| Serum creatinine at D0 (mg/L) – median [IQR] – (range 0.55-1.02mg/dL)                                          | 0.93 [072; 1.21]   | 1.3 [1.08; 1.57]   | <b>0.04</b>  |
| Proteinuria at D0 (mg/g of urine creatinine) – median [IQR]                                                    | 595 [353; 728]     | 579 [303; 1104]    | ns           |
| <b>Delay Biopsy (n=16)</b>                                                                                     |                    |                    | ns           |
| <60 (min) – %                                                                                                  | 60%                | 66.7%              |              |
| 60-120 (min) – %                                                                                               | 20%                | -                  |              |
| 120-180 (min) – %                                                                                              | 20%                | 33.3%              |              |

AKI: acute kidney injury; COPD: chronic obstructive pulmonary disease; CPK: creatinine phospho-kinase; CRP: C-reactive protein; eGFR: estimated glomerular filtration rate; ICU: intensive care unit; IQR: interquartile range; LDH: lactate dehydrogenase; RAAS: renin angiotensin aldosterone system; RRT: renal replacement therapy; SARS-CoV-2: severe acute respiratory syndrome coronavirus 2; SD: standard deviation. p value using t-test when normally distributed variables or rank test if not normally distributed for continuous variable and Fischer exact test for categorical variables

**Supplementary Table 3: Clinical and biological characteristics of the control group (SARS-CoV-2 non-infected patients)**

|                                                              |                   |
|--------------------------------------------------------------|-------------------|
| <b>CLINICAL</b>                                              |                   |
| Age (years) – mean [min; max] (n=5)                          | 58.4 [44; 67]     |
| Women – % (n=5)                                              | 40                |
| Body Mass index (kg/m <sup>2</sup> ) – mean [min; max] (n=4) | 25.2 [16.2; 36.5] |
| <b>Medical history</b>                                       |                   |
| Hypertension – % (n=5)                                       | 60                |
| Diabetes – % (n=5)                                           | 20                |
| Chronic kidney disease – % (n=5)                             | 40                |
| Active cancer or history – % (n=5)                           | 40                |
| Cardiovascular disease – % (n=5)                             | 40                |
| Immunocompromise status – % (n=5)                            | 40                |
| Non-smoker – % (n=5)                                         | 60                |
| RAAS inhibitors drugs – % (n=5)                              | 40                |
| Hydroxychloroquine used – % (n=5)                            | 0                 |
| Contrast products injection – % (n=5)                        | 60                |
| Anti-platelets used priori hospitalization – % (n=5)         | 0                 |
| Anticoagulation during hospitalization – % (n=5)             | 0                 |
| Hospital stay length (days) – median [IQR] (n=5)             | 3 [2; 17]         |
| <b>Severity</b>                                              |                   |
| ICU admission – % (n=5)                                      | 100               |
| Renal severity                                               |                   |
| AKI – % (n=5)                                                | 100               |
| RRT initiation during hospitalization – % (n=5)              | 20                |
| 30% decrease of eGFR during hospitalization – % (n=5)        | 80                |

|                                                                                  |                     |
|----------------------------------------------------------------------------------|---------------------|
| Proteinuria at D0 > 500 mg/g of urine creatinine – % (n=3)                       | 66.7                |
| Hematuria at D0 – % (n=3)                                                        | 100                 |
| <b>BIOLOGICAL</b>                                                                |                     |
| ABO group – % (n=2)<br>A – B – AB – O                                            | 50 – 0 – 0 – 50     |
| Lymphocytes at D0 (/mm <sup>3</sup> ) – median [IQR] (n=5)                       | 540 [10; 1340]      |
| Platelet at D0 (x1000/mm <sup>3</sup> ) – median [IQR] (n=5)                     | 220 [157; 250]      |
| Platelet at end of hospitalization (x1000/mm <sup>3</sup> ) – median [IQR] (n=5) | 129 [98; 344] †     |
| C-reactive protein at D0 (mg/L) – median [IQR] (n=5)                             | 87 [41.4; 284.7]    |
| C-reactive protein at end of hospitalization (mg/L) – median [IQR] (n=5)         | 124.8 [64; 260] †   |
| Fibrinogen at D0 (g/L) – median [IQR]                                            | 4.1 [2.9; 6]        |
| Procalcitonin at D0 (µg/L) – median [IQR] (n=2)                                  | 50.1 [0.11; 100]    |
| D-Dimer at D0 (µg/L) – median [IQR] (n=3)                                        | 2196 [1050; 2400]   |
| LDH at D0 (U/L) – median [IQR] (n=5)                                             | 294 [214; 494]      |
| CPK at D0 (U/L) – median [IQR] (n=5)                                             | 90 [58; 149]        |
| Serum creatinine at D0 (mg/dL) – median [IQR] (n=5)                              | 1.42 [1.2; 1.63]    |
| Serum creatinine at end of hospitalization (mg/dL) – median [IQR] (n=5)          | 2.22 [1.41; 2.68] † |
| Potassium at D0 (mmol/L) – median [IQR] (n=5)                                    | 4.8 [4.3; 4.9]      |
| Proteinuria at D0 (mg/g of urine creatinine) – median [IQR] (n=3)                | 654 [387; 2607]     |
| Delay Biopsy (n=5)                                                               |                     |
| <60 (min) – %                                                                    | 20                  |
| >180 (min) – %                                                                   | 80                  |



AKI: acute kidney injury; COPD: chronic obstructive pulmonary disease; CPK: creatinine phospho-kinase; eGFR: estimated glomerular filtration rate; ICU: intensive care unit; IQR: interquartile range; LDH: lactate dehydrogenase; RAAS: renin angiotensin aldosterone system; RRT: renal replacement therapy; SARS-CoV-2: severe acute respiratory syndrome coronavirus 2; SD: standard deviation. † no statistical difference observed between D0 and end of hospitalization

**Supplementary Table 4: Cases series studies on kidney biopsies in SARS-CoV-2 infected patients**

| <b>Authors (ref)</b> | <b>Post-mortem biopsies (n)</b> | <b>Clinical and biological data</b>                                                                                                               | <b>Light microscopy</b>                                                                                                                                                                                          | <b>Immunostaining</b>                                                                                                                                                  | <b>Electron microscopy</b>                                                                                                                      |
|----------------------|---------------------------------|---------------------------------------------------------------------------------------------------------------------------------------------------|------------------------------------------------------------------------------------------------------------------------------------------------------------------------------------------------------------------|------------------------------------------------------------------------------------------------------------------------------------------------------------------------|-------------------------------------------------------------------------------------------------------------------------------------------------|
| Diao et al. (25)     | Yes (n=6)                       | Renal dysfunction (no clear clinical or biological data)<br>No data on delay between death and autopsy                                            | Variable severity of ATN<br><br>Lymphocytic infiltration on 5/6 biopsies                                                                                                                                         | SARS-CoV-2 antigen (N protein) was detected in the renal tubules (no data on proximal or distal tubules)<br><br>No ACE2 data                                           | Virion and virus-like particles detected (2/6)                                                                                                  |
| Su et al. (26)       | Yes (n=26)                      | Either patients with AKI and no-AKI<br><br>No data on delay between death and autopsy                                                             | Significant ATN<br><br>Occlusion of the glomerular and peritubular capillary lumens by unfragmented erythrocytes (without evidence of thrombi, platelets or fibrinoid necrosis)<br><br>No significant infiltrate | SARS-CoV-2 (N protein) was found at the nuclear or cytoplasmic level in the tubular epithelium of 3/6 patients<br><br>Weak ACE2 staining of the proximal tubules (3/5) | Virion and virus-like particles detected within the epithelium of the proximal tubules, podocytes and, to a lesser extent, distal tubules (7/9) |
| Menter et al. (45)   | Yes (n=18)                      | Patients with mean creatinine level of 2.8mg/dl at death<br><br>Mean delay between death and autopsy was 32.9h                                    | Diffuse ATI<br><br>3 patients showed signs of DIC with fibrin thrombi within glomerular capillaries                                                                                                              | No data                                                                                                                                                                | Virus like particles in endothelial cells (2 patients)                                                                                          |
| Bradley et al. (49)  | Yes (n=14)                      | Detailed clinical presentation with or without AKI<br><br>No data on delay between death and autopsy                                              | Mild to severe arterionephrosclerosis and diabetic nephropathy<br><br>ATI (extensive tubular epithelial vacuolization) (11/14)<br><br>Chronic inflammation and FSGS in 1 patient                                 | 2/10 patients with patchy, granular cytoplasmic staining of the renal tubular epithelial cells (Spike Protein)                                                         | Viral particles in tubular epithelial cells (2 patients) and more rarely in endothelial cells                                                   |
| Golmai et al. (50)   | Yes (n=12)                      | Patients with AKI stage 2 or 3 but low level of proteinuria (between 30 and 100mg/dl)<br><br>Delay between death and biopsy was 18.3h (2-70hours) | All patients had ATI with focal ATN, which varied from mild to diffuse<br><br>No evidence of GN, vasculitis, or TMA                                                                                              | All biopsies showed negative immunohistochemistry staining for SARS-CoV-2 (N protein)<br><br>Negative in <i>in situ</i> hybridization (4/12)                           | Absence of virion in renal cells (12/12)                                                                                                        |

|                         |            |                                                                                                                                                                                                                                     |                                                                                                                                                                                                                                                      |                                                                                                                                                                               |                                                                                                                                                                                  |
|-------------------------|------------|-------------------------------------------------------------------------------------------------------------------------------------------------------------------------------------------------------------------------------------|------------------------------------------------------------------------------------------------------------------------------------------------------------------------------------------------------------------------------------------------------|-------------------------------------------------------------------------------------------------------------------------------------------------------------------------------|----------------------------------------------------------------------------------------------------------------------------------------------------------------------------------|
| Santoriello et al. (51) | Yes (n=42) | Detailed clinical presentation with AKI (in the majority of cases 40/42) and proteinuria (evaluated by dipstick in 23/29)<br><br>6 patients were dead at the time of admission<br><br>Delay between death and autopsy was 21.8hours | All patients had ATI and arteriosclerosis<br><br>No significant glomerular changes except one patient with FSGS, one with IgA nephropathy and 6 with focal (less than 5% of glomeruli) with fibrin thrombi                                           | All biopsies showed negative immunohistochemistry staining for SARS-CoV-2 (Spike protein) (10/42)<br><br>Negative in <i>in situ</i> hybridization (10/42)                     | No definitive virions were identified (8/42)                                                                                                                                     |
| Xia et al.              | Yes (n=10) | Detailed clinical and biological presentation with AKI (in all cases 10/10) and low level of proteinuria (evaluated by dipstick)<br><br>No data on delay between death and autopsy                                                  | All patients showed various degree of ATI<br><br>Glomerular lesions were not remarkable except swollen endothelial cells<br><br>Venous thrombosis in a patient with anti-phospholipid antibodies                                                     | All biopsies showed negative immunohistochemistry staining for SARS-CoV-2 (Spike protein)<br><br>RNA extraction of SARS-CoV-2 (N-gen) from kidney samples all negative (9/10) | A few particles of a diameter of about 60–100 nm were observed in the cytoplasm of renal proximal tubular epithelial cells and some of these particles were enclosed in vesicles |
| Sharma et al. (48)      | No (n=10)  | All with various level of AKI (8/10 on RRT) and proteinuria with or without hematuria                                                                                                                                               | Various level of ATN in all patients<br><br>TMA (2/10)<br><br>FSGS (1/10)                                                                                                                                                                            | All biopsies showed negative immunohistochemistry staining for SARS-CoV-2 (N protein)                                                                                         | No evidence of viral presence                                                                                                                                                    |
| Kudose et al.           | No (n=17)  | Various level of AKI (15/17) and proteinuria (9/17 nephrotic range) with or without hematuria                                                                                                                                       | Various level of ATI in all patients<br><br>FSGS (5/17)<br><br>MCD (1/17)<br><br>Tubulo-reticular inclusions (2/17)<br><br>MN (2/17)<br><br>Lupus nephritis (1/17)<br><br>Anti-GBM (1/17)<br><br>Cellular rejection (for transplanted patients 3/17) | No definitive staining (16/17) (Spike Protein)<br><br>Possibly positive tubular cell staining in 2 cases in <i>in situ</i> hybridization (2/16)                               | Absence of virion in renal cells (13/17)                                                                                                                                         |
| Akilesh et al.          | No (n=17)  | Detailed clinical and biological presentation with AKI (in all cases 15/17) and proteinuria (11/17)                                                                                                                                 | ATI within 13/17 patients<br><br>FSGS within 11/17 patients<br><br>MCD within 1/17 patients<br><br>Acute endothelial cells injury within 6patients                                                                                                   | 4/17 biopsies showed negative immunohistochemistry staining for SARS-CoV-2 (N protein)<br><br>Negative in <i>in situ</i> hybridization (4/17)                                 | No definitive virions were identified (17/17)                                                                                                                                    |

|                    |           |                                                                                                                                                                                                |                                                                                                                                                                                                                  |                                                 |                                               |
|--------------------|-----------|------------------------------------------------------------------------------------------------------------------------------------------------------------------------------------------------|------------------------------------------------------------------------------------------------------------------------------------------------------------------------------------------------------------------|-------------------------------------------------|-----------------------------------------------|
| Nasr et al.        | No (n=13) | Detailed clinical and biological presentation with AKI (in all cases 13/17) and proteinuria (11/13)                                                                                            | Diffuse ATI (13/13)<br>Collapsing glomerulopathy (8/13)<br>MN (1/13)<br>RPGN (1/13)<br>Diabetic glomerulosclerosis (3/13)<br>Pre-existing known condition in 3/13 (MN, IgA nephropathy and diabetic nephropathy) | Negative in <i>in situ</i> hybridization (1/13) | No definitive virions were identified (13/13) |
| Shetty et al. (46) | No (n=6)  | Detailed clinical and biological presentation with AKI in all cases and proteinuria in all case (4 native kidney and 1 kidney transplant patient, 2 patients with CKD previously to admission) | Collapsing glomerulopathy (5/6)<br><br>Diabetic glomerulosclerosis (1/6)                                                                                                                                         | Not done                                        | No definitive virions were identified (6/6)   |

ACE2: angiotensin-converting enzyme 2; AKI: acute kidney injury; ATI: acute tubular injury; ATN: acute tubular necrosis; CKD: chronic kidney disease; DIC: disseminated intravascular coagulation; FSGS: focal segmental glomerulosclerosis; GBM: glomerular basement membrane; GN: glomerulonephritis; MN: membranous nephropathy; MCD: minimal change disease; NP: nucleocapsid protein; RNA: ribonucleic acid; RPGN: rapidly progressive glomerulonephritis; RRT: renal replacement therapy; SARS-CoV-2: severe acute respiratory syndrome coronavirus 2; TMA: thrombotic micro-angiopathy.

**Supplementary Figure 1. Non-thrombotic congestion in glomerular and peritubular capillaries of kidney samples from patients with COVID-19**

(A) Hematoxylin & Eosine coloration; (B) Immunostaining against the platelet marker, CD42; (C) Immunostaining against the platelet marker, CD61; (D) Martius Blue Scarlett staining. (patient #6). *Scale bar, 50 μm.*

**Supplementary Figure 2. Representative immunostaining for angiotensin-converting enzyme 2 (ACE2) in post-mortem paraffin-embedded kidney tissue from a patient with COVID-19 (patient #11)**

ACE2 mainly stained the brush border of proximal tubules with a weak cytoplasm staining. A segmental and focal staining of glomerular parietal epithelial cells is also observed.

**Supplementary Figure 3. Positive immunohistochemistry staining for the SARS-CoV-2 nucleocapsid protein at low power magnification**

IHC staining of renal biopsy tissue from two different patients with COVID-19 (A,B patient #3) and (C,D patient #1) shows positivity in some tubules. Higher magnification for the boxed area with scale bars = 100 μm (A,C) and 50 μm (B,D)

**Supplementary Figure 4. Immunostaining for (A) nucleocapsid protein of the SARS-CoV-2 (NP) and (B) Sodium-Chloride cotransporter (NCC) on serial paraffin-embedded sections**

Some NCC-positive tubes (symbols) demonstrate non-uniform positivity for nucleocapsid protein of the SARS-CoV-2 (patient #6). *Scale bars: 20 μm (A,B).*

**Supplementary Figure 5. Detection and spatial distribution of viral RNA using fluorescence *in situ* hybridization.**

nCoV2019-S RNA is in green; *Lotus tetragonolobus* lectin (LTL) is in red; DAPI is in blue (patient #2, patient #4).

**Supplementary Figure 6. Experimental controls of the fluorescent *in situ* hybridization experiment**

The column on the left displays positive signal for the housekeeping genes UBC (Polyubiquitin-C) and PPIB (Peptidyl-prolyl cis-trans isomerase B) in patients #2 and #10, whereas the column on the right shows negative signal (with a negligible level of background) for the bacterial dapB.

**Supplementary Figure 7. Experimental controls of the immunostaining procedures**

Representative images of negative (kidney sample from control #P1 patient) (A) and positive (lung sample of a guinea pig infected by SARS-Cov-2) (B) cases of immunostaining for the nucleocapsid of SARS-CoV-2 using 2019-nCoV N-Protein (NP) rabbit polyclonal antibody (ABclonal #A20016). *Scale bars: 200  $\mu$ m (A), 100  $\mu$ m (B).*

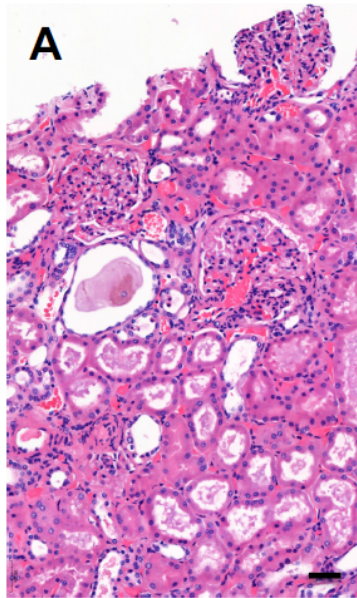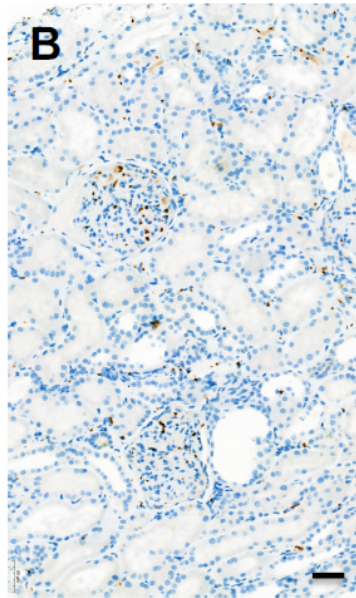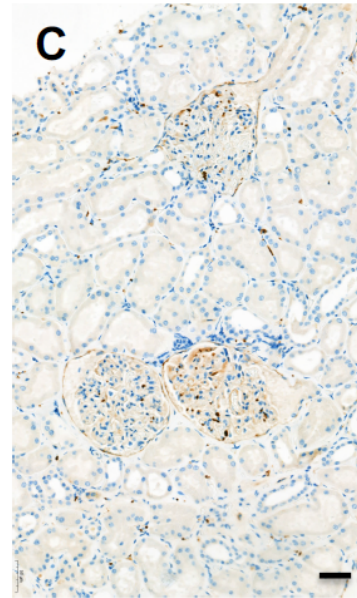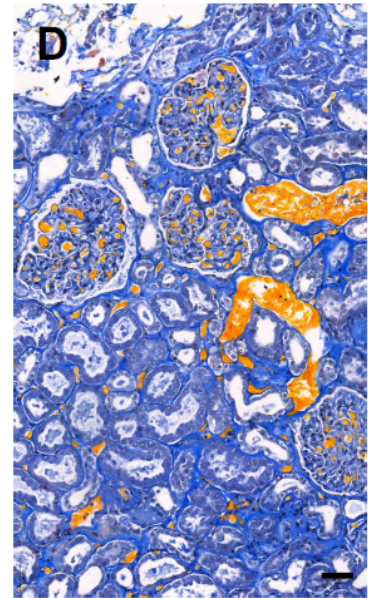

**Supplementary Figure 1**

A

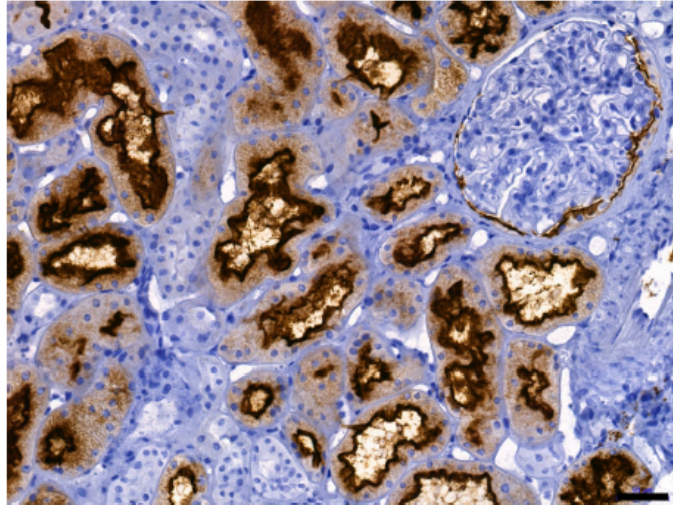

Supplementary Figure 2



A

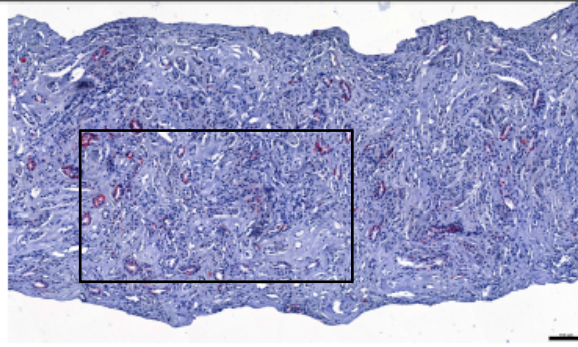

B

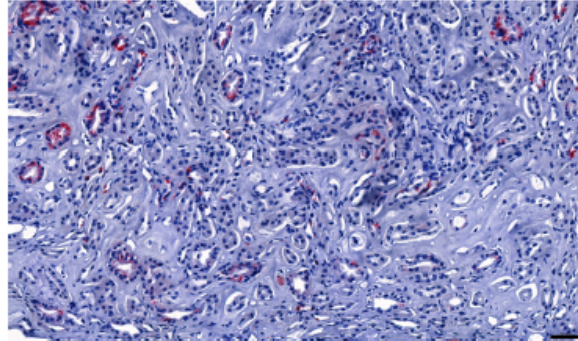

C

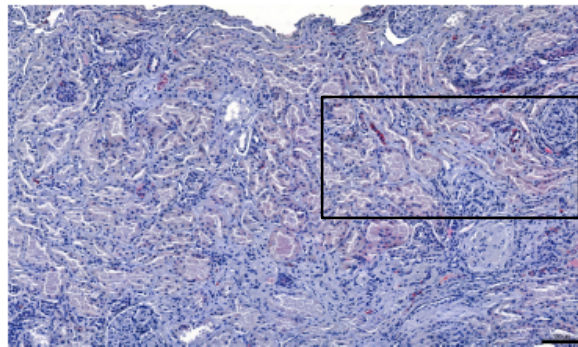

D

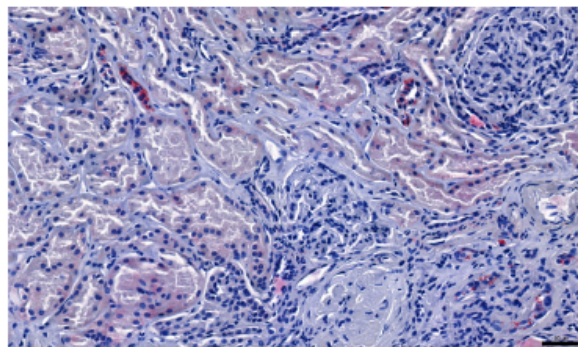

**Supplementary Figure 3**

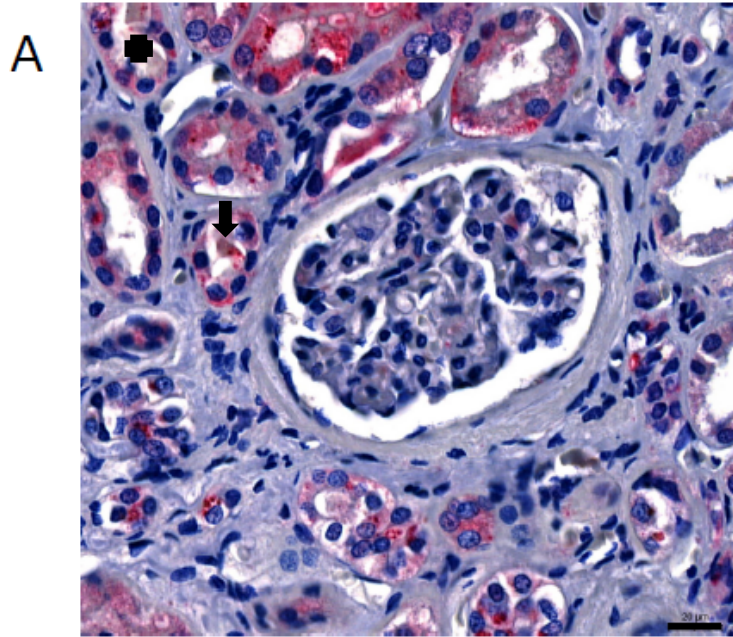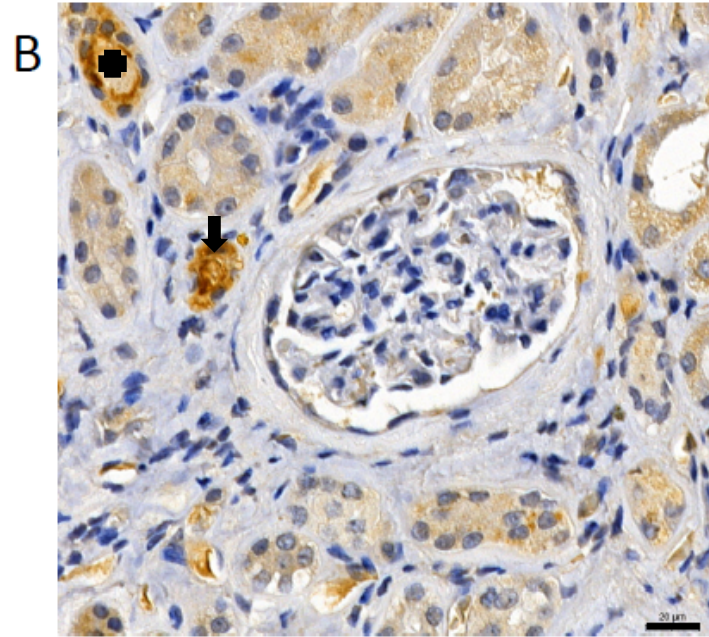

Supplementary Figure 4

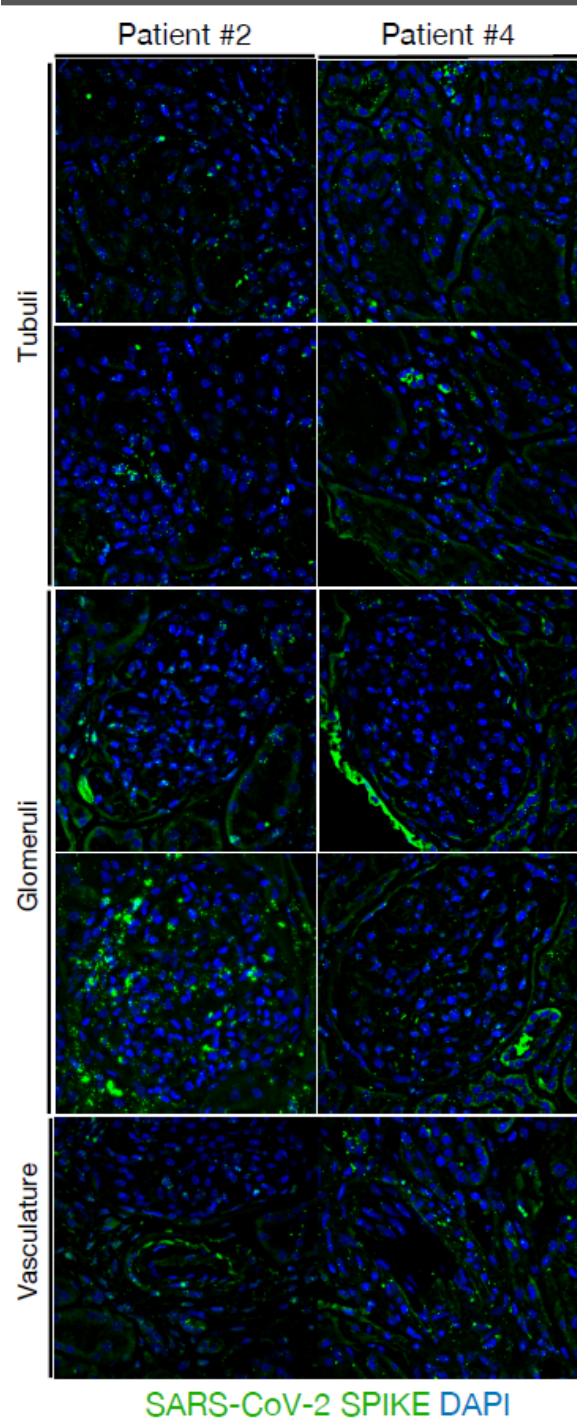

Supplementary Figure 5

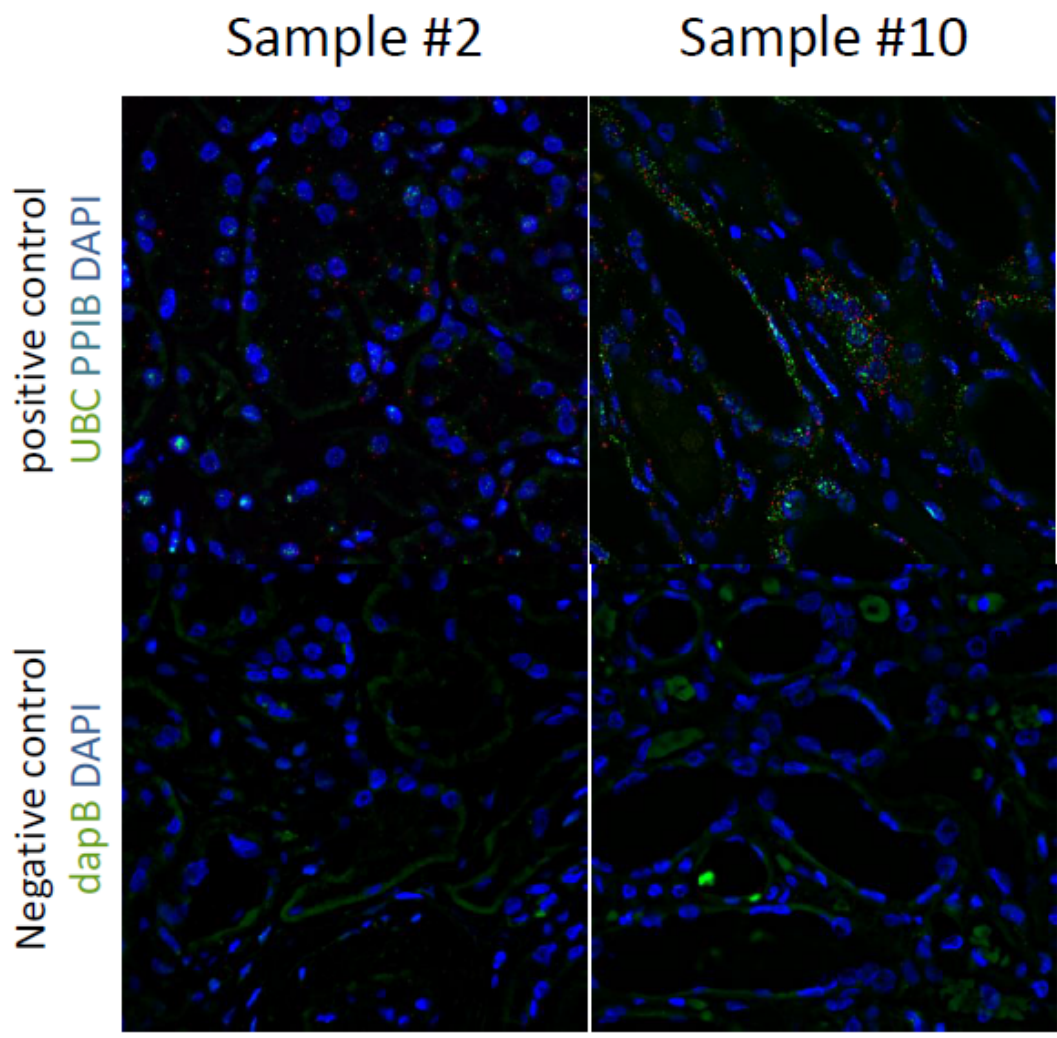

Supplementary Figure 6

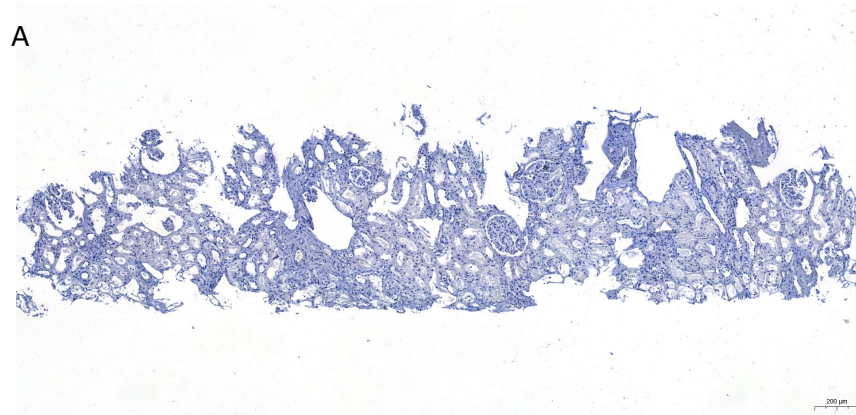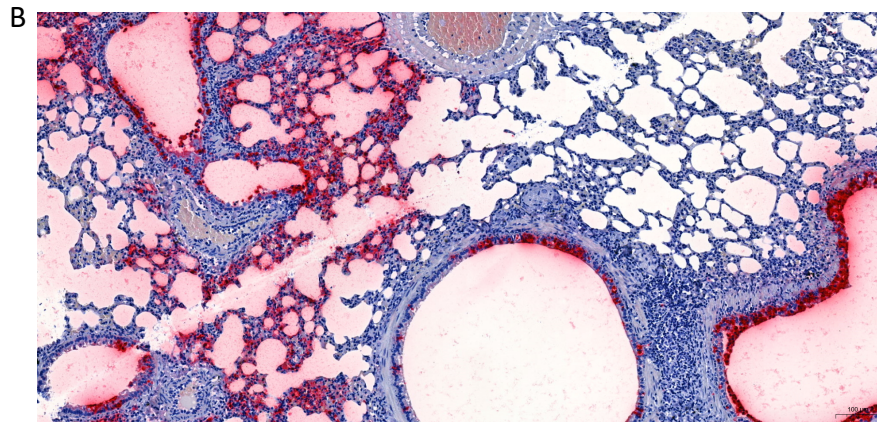

**Supplementary Figure 7**
